# Supplementary material for: “That’s what keeps me up at night”: A qualitative pilot study on how arts-based existential interventions could benefit children grappling with death
Source: Research Square preprint supplement (doi:10.21203/rs.3.rs-7776635/v1), 2025-11-25
Supplement: Supplementary file 1 [file 0bca4c7a91f44cea377d4eb8.docx]

**Supplemental Materials**

**Table 2:** Detailed full intervention plan.

| Week | Workshop Theme | Artistic Activity | Philosophical Discussion Questions |
| --- | --- | --- | --- |
| 1 | Beauty and Ugliness | Ugly Drawing | What makes something ugly?  How did you react to drawing something ugly?  Can something be beautiful and ugly at the same time? |
| 2 | Identity | Lego™ Self-Portrait | How do we see ourselves?  What makes us who we are?  Does who we are change over time, or do we always remain the same? |
| 3 | Self-Care | Play-Doh™ Sculpture of a Safe Space | Is it important to have a safe space? Why or why not?  Can self-care be a type of love?  What does it mean to love yourself? |
| 4 | Caring for others | Mirror Dancing | Can we care for other by making art?  *Should* we care for others?  How do you feel when you do?  Can we share care and emotions with others? How are we affected by their emotions?  What is empathy? |
| 5 | Caring for Nature | Photovoice on Nature | What is nature?  Does nature take care of us?  Are we responsible for taking care of nature? |
| 6 | Emotions (1) | Acting out emotions (Dance-Movement) | What are emotions?  Are there good and bad emotions?  Are feeling emotions important? |
| 7 | Emotions (2) | Watercolour scrapbook of an emotion of their choice | Why do we feel emotions?  Can we feel emotions for other people?  Do you think we need to control our emotions? |
| 8 | Death––personal mortality | Watercolour Scrapbook | What does it mean to be dead?  What happens when we die?  Are you going to die, too?  If you could choose, would you want to live forever? Why or why not? |
| 9 | Death––bereavement | Sculpture of a beautiful death | Can death be beautiful? Why or why not?  Why do we grieve?  Is it okay to be sad for a long time after someone dies?  How can we keep loved ones in our heart when they die?  Does everybody grieve the same way? |
| 10 | Community | Butterfly Mural | What is a community?  Is it important to have communities?  Do people feel a sense of belonging in a community?  How can we ensure we feel a sense of belonging? |
